# Supplementary material for: Genome-Wide Transcriptional and Functional Analysis of Human T Lymphocytes Treated with Benzo[α]pyrene
Source: MDPI journal article supplement (doi:10.3390/ijms19113626), 2018-11-17
Supplement: s1 [file s1]

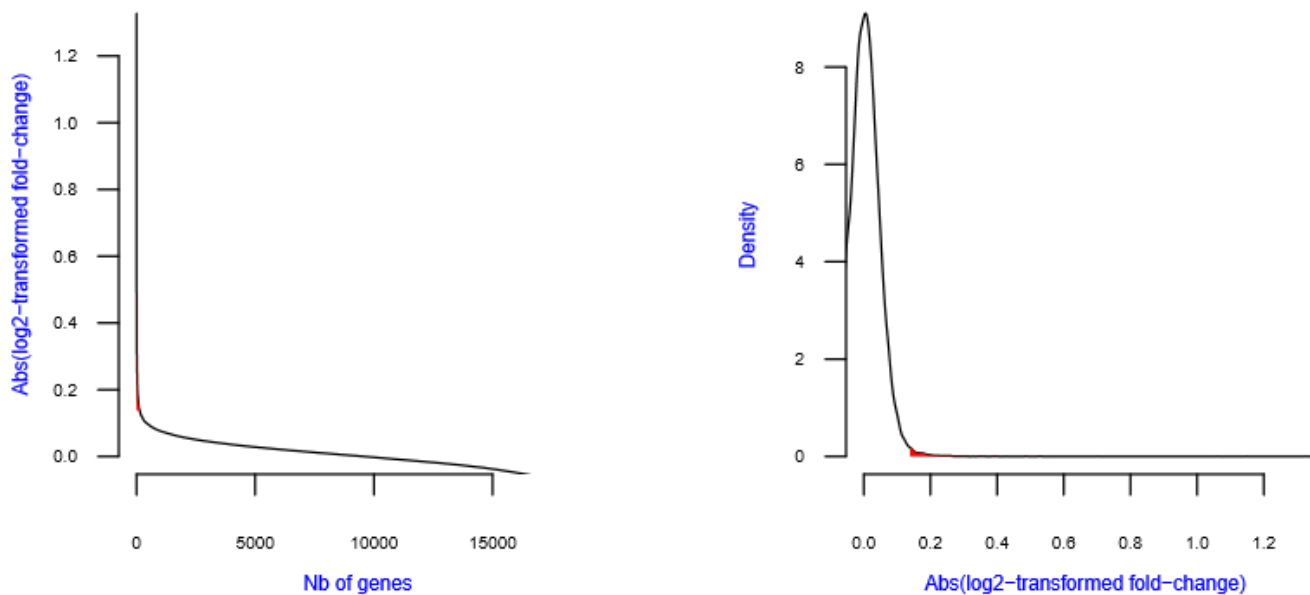

**Supplementary Figure S1: Selection criteria for microarray data.** The filtered genes with at least one signal above the background expression cutoff ( $\geq 0.0$ ) and with a minimal variation of 10% between both experimental conditions were determined by the inflection point of the fold-change curve.
