# Supplementary material for: Genome-Wide Transcriptional and Functional Analysis of Human T Lymphocytes Treated with Benzo[α]pyrene
Source: MDPI journal article supplement (doi:10.3390/ijms19113626), 2018-11-17
Supplement: s1 [file s1]

**Supplemental Table S1 : Genes differentially regulated after treatment of human T lymphocytes with 2  $\mu$ M B[a]P for 48 h**

| ID     | GeneName        | Description                                                                                                                                                                                                                                                                                                                                                                                                           | Differential expression (log-2) |
|--------|-----------------|-----------------------------------------------------------------------------------------------------------------------------------------------------------------------------------------------------------------------------------------------------------------------------------------------------------------------------------------------------------------------------------------------------------------------|---------------------------------|
| 23461  | <i>ABCA5</i>    | ATP-binding cassette, sub-family A (ABC1), member 5;ATP-binding cassette A5                                                                                                                                                                                                                                                                                                                                           | 0,142                           |
| 10257  | <i>ABCC4</i>    | ATP-binding cassette, sub-family C (CFTR/MRP), member 4;MRP/cMOAT-related ABC transporter;bA464I2.1 (ATP-binding cassette, sub-family C (CFTR/MRP), member 4);canalicular multispecific organic anion transporter (ABC superfamily);multi-specific organic anion transporter B                                                                                                                                        | -0,141                          |
| 2180   | <i>ACSL1</i>    | acyl-CoA synthetase long-chain family member 1;LACS 1;LACS 2;acyl-CoA synthetase 1;fatty-acid-Coenzyme A ligase, long-chain 1;fatty-acid-Coenzyme A ligase, long-chain 2;lignoceroyl-CoA synthase;long-chain acyl-CoA synthetase 1;long-chain acyl-CoA synthetase 2;long-chain fatty acid-CoA ligase 2;long-chain fatty-acid-coenzyme A ligase 1;palmitoyl-CoA ligase 1;palmitoyl-CoA ligase 2;palmitoyl-CoA ligase 1 | -0,160                          |
| 115    | <i>ADCY9</i>    | adenylate cyclase 9;ATP pyrophosphate-lyase 9;adenylate cyclase type IX;adenylyl cyclase 9;type IX ATP pyrophosphate-lyase                                                                                                                                                                                                                                                                                            | 0,178                           |
| 119    | <i>ADD2</i>     | adducin 2 (beta);erythrocyte adducin subunit beta                                                                                                                                                                                                                                                                                                                                                                     | 0,155                           |
| 976    | <i>ADGRE5</i>   | adhesion G protein-coupled receptor E5;CD97 molecule;leukocyte antigen CD97;seven transmembrane helix receptor;seven-span transmembrane protein;seven-transmembrane, heterodimeric receptor associated with inflammation                                                                                                                                                                                              | -0,138                          |
| 9289   | <i>ADGRG1</i>   | adhesion G protein-coupled receptor G1;7-transmembrane protein with no EGF-like N-terminal domains-1;G protein-coupled receptor 56                                                                                                                                                                                                                                                                                    | 0,346                           |
| 133    | <i>ADM</i>      | adrenomedullin;preproadrenomedullin;proadrenomedullin N-20 terminal peptide                                                                                                                                                                                                                                                                                                                                           | 0,196                           |
| 3899   | <i>AFF3</i>     | AF4/FMR2 family, member 3;MLLT2-related protein;lymphoid nuclear protein 4;lymphoid nuclear protein related to AF4;protein LAF-4                                                                                                                                                                                                                                                                                      | -0,140                          |
| 57491  | <i>AHRR</i>     | aryl-hydrocarbon receptor repressor;ahR repressor;aryl hydrocarbon hydroxylase regulator;class E basic helix-loop-helix protein 77;dioxin receptor repressor                                                                                                                                                                                                                                                          | 0,156                           |
| 301    | <i>ANXA1</i>    | annexin A1;annexin I (lipocortin I);annexin-1;calpactin II;calpactin-2;chromobindin-9;phospholipase A2 inhibitory protein                                                                                                                                                                                                                                                                                             | -0,158                          |
| 10123  | <i>ARLAC</i>    | ADP-ribosylation factor-like 4C;ADP ribosylation factor-like protein 7;ADP-ribosylation factor-like 7;ADP-ribosylation factor-like protein 7;ADP-ribosylation factor-like protein LAK                                                                                                                                                                                                                                 | 0,186                           |
| 51676  | <i>ASB2</i>     | ankyrin repeat and SOCS box containing 2;ankyrin repeat and SOCS box-containing protein 2a                                                                                                                                                                                                                                                                                                                            | 0,388                           |
| 55252  | <i>ASXL2</i>    | additional sex combs like transcriptional regulator 2;additional sex combs like 2;additional sex combs-like protein 2;polycomb group protein ASXH2                                                                                                                                                                                                                                                                    | -0,177                          |
| 80162  | <i>ATHL1</i>    | ATH1, acid trehalase-like 1 (yeast)                                                                                                                                                                                                                                                                                                                                                                                   | 0,161                           |
| 55509  | <i>BATF3</i>    | basic leucine zipper transcription factor, ATF-like 3;21 kDa small nuclear factor isolated from T-cells;21-kD small nuclear factor isolated from T cells;B-ATF-3;Jun dimerization protein 1;Jun dimerization protein p21SNFT                                                                                                                                                                                          | -0,158                          |
| 353500 | <i>BMP8A</i>    | bone morphogenetic protein 8a;BMP-8A                                                                                                                                                                                                                                                                                                                                                                                  | -0,204                          |
| 664    | <i>BNIP3</i>    | BCL2/adenovirus E1B 19kDa interacting protein 3                                                                                                                                                                                                                                                                                                                                                                       | 0,166                           |
| 53838  | <i>C11orf24</i> | chromosome 11 open reading frame 24                                                                                                                                                                                                                                                                                                                                                                                   | 0,144                           |
| 128346 | <i>C1orf162</i> | chromosome 1 open reading frame 162                                                                                                                                                                                                                                                                                                                                                                                   | -0,160                          |
| 203228 | <i>C9orf72</i>  | chromosome 9 open reading frame 72                                                                                                                                                                                                                                                                                                                                                                                    | -0,141                          |

|        |                |                                                                                                                                                                                                                                                                                                                                                                                                                     |        |
|--------|----------------|---------------------------------------------------------------------------------------------------------------------------------------------------------------------------------------------------------------------------------------------------------------------------------------------------------------------------------------------------------------------------------------------------------------------|--------|
| 91768  | <i>CABLES1</i> | Cdk5 and Abl enzyme substrate 1;interactor with CDK3 1                                                                                                                                                                                                                                                                                                                                                              | 0,426  |
| 800    | <i>CALD1</i>   | caldesmon 1                                                                                                                                                                                                                                                                                                                                                                                                         | 0,184  |
| 6348   | <i>CCL3</i>    | chemokine (C-C motif) ligand 3;G0/G1 switch regulatory protein 19-1;PAT 464.1;SIS-beta;macrophage inflammatory protein 1-alpha;small inducible cytokine A3 (homologous to mouse Mip-1a);tonsillar lymphocyte LD78 alpha protein                                                                                                                                                                                     | -0,177 |
| 414062 | <i>CCL3L3</i>  | chemokine (C-C motif) ligand 3-like 3;G0/G1 switch regulatory protein 19-2;LD78-beta(1-70);chemokine (C-C motif) ligand 3-like, centromeric;small inducible cytokine A3-like 1;tonsillar lymphocyte LD78 beta protein                                                                                                                                                                                               | -0,145 |
| 9560   | <i>CCL4L2</i>  | chemokine (C-C motif) ligand 4-like 2;MIP-1-beta;macrophage inflammatory protein 1-beta;macrophage inflammatory protein-1b2;monocyte adherence-induced protein 5-alpha;small inducible cytokine A4-like                                                                                                                                                                                                             | -0,203 |
| 83605  | <i>CCM2</i>    | cerebral cavernous malformation 2;malcavernin                                                                                                                                                                                                                                                                                                                                                                       | 0,169  |
| 9134   | <i>CCNE2</i>   | cyclin E2                                                                                                                                                                                                                                                                                                                                                                                                           | 0,169  |
| 901    | <i>CCNG2</i>   | cyclin G2                                                                                                                                                                                                                                                                                                                                                                                                           | 0,176  |
| 135228 | <i>CD109</i>   | CD109 molecule;150 kDa TGF-beta-1-binding protein;C3 and PZP-like alpha-2-macroglobulin domain-containing protein 7;Gov platelet alloantigens;activated T-cell marker CD109;platelet-specific Gov antigen                                                                                                                                                                                                           | 0,262  |
| 4345   | <i>CD200</i>   | CD200 molecule;CD200 antigen;MRC OX-2 antigen;antigen identified by monoclonal antibody MRC OX-2                                                                                                                                                                                                                                                                                                                    | -0,165 |
| 10666  | <i>CD226</i>   | CD226 molecule;DNAX accessory molecule 1;DNAX accessory molecule-1;T lineage-specific activation antigen 1 antigen;adhesion glycoprotein;platelet and T cell activation antigen 1                                                                                                                                                                                                                                   | 0,220  |
| 928    | <i>CD9</i>     | CD9 molecule;5H9 antigen;BA-2/p24 antigen;CD9 antigen (p24);cell growth-inhibiting gene 2 protein;leukocyte antigen MIC3;motility related protein-1;tetraspanin-29                                                                                                                                                                                                                                                  | 0,212  |
| 1026   | <i>CDKN1A</i>  | cyclin-dependent kinase inhibitor 1A (p21, Cip1);CDK-interacting protein 1;CDK-interaction protein 1;DNA synthesis inhibitor;melanoma differentiation associated protein 6;wild-type p53-activated fragment 1                                                                                                                                                                                                       | 0,267  |
| 148523 | <i>CIART</i>   | circadian associated repressor of transcription;chIP-derived repressor of network oscillator;computationally highlighted repressor of the network oscillator                                                                                                                                                                                                                                                        | 0,172  |
| 134147 | <i>CMBL</i>    | carboxymethylenebutenolidase homolog (Pseudomonas);carboxymethylenebutenolidase-like (Pseudomonas)                                                                                                                                                                                                                                                                                                                  | 0,152  |
| 1293   | <i>COL6A3</i>  | collagen, type VI, alpha 3;collagen VI, alpha-3 polypeptide                                                                                                                                                                                                                                                                                                                                                         | -0,337 |
| 643    | <i>CXCR5</i>   | chemokine (C-X-C motif) receptor 5;Burkitt lymphoma receptor 1, GTP binding protein (chemokine (C-X-C motif) receptor 5);Burkitt lymphoma receptor 1, GTP-binding protein;CXC-R5;CXCR-5;MDR-15;monocyte-derived receptor 15                                                                                                                                                                                         | 0,156  |
| 1543   | <i>CYP1A1</i>  | cytochrome P450, family 1, subfamily A, polypeptide 1;CYP1A1;aryl hydrocarbon hydroxylase;cytochrome P1-450, dioxin-inducible;cytochrome P450 form 6;cytochrome P450, subfamily I (aromatic compound-inducible), polypeptide 1;cytochrome P450-C;cytochrome P450-P1;flavoprotein-linked monooxygenase;xenobiotic monooxygenase                                                                                      | 1,152  |
| 1545   | <i>CYP1B1</i>  | cytochrome P450, family 1, subfamily B, polypeptide 1;aryl hydrocarbon hydroxylase;cytochrome P450, subfamily I (dioxin-inducible), polypeptide 1 (glaucoma 3, primary infantile);flavoprotein-linked monooxygenase;microsomal monooxygenase;xenobiotic monooxygenase                                                                                                                                               | 1,058  |
| 23586  | <i>DDX58</i>   | DEAD (Asp-Glu-Ala-Asp) box polypeptide 58;DEAD box protein 58;DEAD/H (Asp-Glu-Ala-Asp/His) box polypeptide;RNA helicase RIG-I;retinoic acid-inducible gene 1 protein;retinoic acid-inducible gene I protein                                                                                                                                                                                                         | -0,148 |
| 91319  | <i>DERL3</i>   | derlin 3;DERtrin 3;DERtrin-3;Der1-like domain family, member 3;degradation in endoplasmic reticulum protein 3;der1-like protein 3                                                                                                                                                                                                                                                                                   | 0,168  |
| 10202  | <i>DHRS2</i>   | dehydrogenase/reductase (SDR family) member 2;dehydrogenase/reductase member 2;dicarbonyl reductase HEP27;protein D;short chain dehydrogenase/reductase family 25C member 1;short chain dehydrogenase/reductase family 25C, member 1;short-chain alcohol dehydrogenase family member                                                                                                                                | 0,189  |
| 10170  | <i>DHRS9</i>   | dehydrogenase/reductase (SDR family) member 9;3-alpha hydroxysteroid dehydrogenase;NADP-dependent retinol dehydrogenase/reductase;retinol dehydrogenase 15;retinol dehydrogenase homolog;short chain dehydrogenase/reductase family 9C member 4;short chain dehydrogenase/reductase family 9C, member 4;short-chain dehydrogenase/reductase retSDR8;tracheobronchial epithelial cell-specific retinol dehydrogenase | -0,150 |
| 30836  | <i>DNTTIP2</i> | deoxynucleotidyltransferase, terminal, interacting protein 2;LPTS-interacting protein 2;acidic 82 kDa protein mRNA;estrogen receptor binding protein;tdT-interacting factor 2                                                                                                                                                                                                                                       | 0,139  |

|        |                |                                                                                                                                                                                                                                                                                                                                       |        |
|--------|----------------|---------------------------------------------------------------------------------------------------------------------------------------------------------------------------------------------------------------------------------------------------------------------------------------------------------------------------------------|--------|
| 1803   | <i>DPP4</i>    | dipeptidyl-peptidase 4;ADCP-2;DPP IV;T-cell activation antigen CD26;adenosine deaminase complexing protein 2;dipeptidyl peptidase IV;dipeptidylpeptidase 4;dipeptidylpeptidase IV (CD26, adenosine deaminase complexing protein 2)                                                                                                    | -0,222 |
| 1846   | <i>DUSP4</i>   | dual specificity phosphatase 4;MAP kinase phosphatase 2;VH1 homologous phosphatase 2;dual specificity protein phosphatase hVH2;mitogen-activated protein kinase phosphatase 2;serine/threonine specific protein phosphatase                                                                                                           | 0,140  |
| 144455 | <i>E2F7</i>    | E2F transcription factor 7;E2F-7                                                                                                                                                                                                                                                                                                      | 0,181  |
| 60401  | <i>EDA2R</i>   | ectodysplasin A2 receptor;EDA-A2 receptor;X-linked ectodysplasin-A2 receptor;tumor necrosis factor receptor superfamily member XEDAR                                                                                                                                                                                                  | 0,154  |
| 5167   | <i>ENPP1</i>   | ectonucleotide pyrophosphatase/phosphodiesterase 1;E-NPP 1;Ly-41 antigen;alkaline phosphodiesterase 1;membrane component chromosome 6 surface marker 1;membrane component, chromosome 6, surface marker 1;phosphodiesterase I/nucleotide pyrophosphatase 1;plasma-cell membrane glycoprotein 1;plasma-cell membrane glycoprotein PC-1 | -0,207 |
| 2034   | <i>EPAS1</i>   | endothelial PAS domain protein 1;EPAS-1;HIF-1-alpha-like factor;HIF-1alpha-like factor;HIF-2-alpha;HIF2-alpha;PAS domain-containing protein 2;basic-helix-loop-helix-PAS protein MOP2;class E basic helix-loop-helix protein 73;hypoxia-inducible factor 2 alpha;hypoxia-inducible factor 2-alpha;member of PAS protein 2             | -0,174 |
| 2109   | <i>ETFB</i>    | electron-transfer-flavoprotein, beta polypeptide;beta-ETF;electron transfer flavoprotein beta subunit;electron transfer flavoprotein beta-subunit;electron transfer flavoprotein, beta polypeptide;electron-transferring-flavoprotein, beta polypeptide                                                                               | 0,153  |
| 59271  | <i>EVA1C</i>   | eva-1 homolog C (C. elegans);family with sequence similarity 176, member C;protein FAM176C                                                                                                                                                                                                                                            | -0,182 |
| 51466  | <i>EVL</i>     | Enah/Vasp-like;ena/vasodilator-stimulated phosphoprotein-like                                                                                                                                                                                                                                                                         | 0,154  |
| 2184   | <i>FAH</i>     | fumarylacetoacetate hydrolase (fumarylacetoacetase);FAA;beta-diketonase                                                                                                                                                                                                                                                               | 0,183  |
| 642273 | <i>FAM110C</i> | family with sequence similarity 110, member C                                                                                                                                                                                                                                                                                         | 0,179  |
| 2232   | <i>FDXR</i>    | ferredoxin reductase;AR;adrenodoxin reductase;adrenodoxin-NADP(+) reductase;ferredoxin--NADP(+) reductase                                                                                                                                                                                                                             | 0,147  |
| 83888  | <i>FGFBP2</i>  | fibroblast growth factor binding protein 2;37 kDa killer-specific secretory protein;FGF-BP2;FGF-binding protein 2;FGFBP-2;HBp17-RP;HBp17-related protein;killer-specific secretory protein of 37 kDa                                                                                                                                  | 0,362  |
| 246176 | <i>GAS2L2</i>  | growth arrest-specific 2 like 2;GAS2-related protein on chromosome 17                                                                                                                                                                                                                                                                 | -0,162 |
| 257144 | <i>GCSAM</i>   | germinal center-associated, signaling and motility;germinal center B-cell-expressed transcript 2 protein;germinal center expressed transcript 2;germinal center-associated lymphoma protein;human germinal center-associated lymphoma                                                                                                 | 0,147  |
| 2708   | <i>GJB2</i>    | gap junction protein, beta 2, 26kDa;connexin 26;gap junction protein beta 2;mutant gap junction protein beta 2                                                                                                                                                                                                                        | 0,702  |
| 10804  | <i>GJB6</i>    | gap junction protein, beta 6, 30kDa;connexin 30;connexin-30;ectodermal dysplasia 2, hidrotic (Clouston syndrome);gap junction protein, beta 6 (connexin 30)                                                                                                                                                                           | 0,528  |
| 2740   | <i>GLP1R</i>   | glucagon-like peptide 1 receptor;GLP-1 receptor;GLP-1-R;GLP-1R                                                                                                                                                                                                                                                                        | -0,145 |
| 2838   | <i>GPR15</i>   | G protein-coupled receptor 15;brother of Bonzo                                                                                                                                                                                                                                                                                        | 0,171  |
| 84636  | <i>GPR174</i>  | G protein-coupled receptor 174                                                                                                                                                                                                                                                                                                        | -0,154 |
| 9290   | <i>GPR55</i>   | G protein-coupled receptor 55                                                                                                                                                                                                                                                                                                         | 0,228  |
| 3003   | <i>GZMK</i>    | granzyme K (granzyme 3; tryptase II);NK-Tryp-2;NK-tryptase-2;fragmentin-3;granzyme 3;granzyme K (serine protease, granzyme 3;granzyme-3;tryptase II                                                                                                                                                                                   | -0,155 |
| 3090   | <i>HIC1</i>    | hypermethylated in cancer 1;zinc finger and BTB domain-containing protein 29                                                                                                                                                                                                                                                          | 0,210  |
| 79618  | <i>HMBOX1</i>  | homeobox containing 1;homeobox telomere-binding protein 1;homeobox-containing protein PBHNF                                                                                                                                                                                                                                           | -0,149 |

|           |                     |                                                                                                                                                                                                                                                                                                                                                                                                                                                                                                                                         |        |
|-----------|---------------------|-----------------------------------------------------------------------------------------------------------------------------------------------------------------------------------------------------------------------------------------------------------------------------------------------------------------------------------------------------------------------------------------------------------------------------------------------------------------------------------------------------------------------------------------|--------|
| 8870      | <i>IER3</i>         | immediate early response 3;PACAP-responsive gene 1 protein;anti-death protein;differentiation-dependent gene 2 protein;expressed in pancreatic carcinoma;gly96, mouse, homolog of;immediate early protein GLY96;immediate early response 3 protein;immediately early gene X-1;protein DIF-2                                                                                                                                                                                                                                             | 0,181  |
| 10561     | <i>IFI44</i>        | interferon-induced protein 44;TBC/LysM-associated domain containing 5;interferon-induced, hepatitis C-associated microtubular aggregate protein (44kD);microtubule-associated protein 44                                                                                                                                                                                                                                                                                                                                                | -0,322 |
| 10964     | <i>IFI44L</i>       | interferon-induced protein 44-like                                                                                                                                                                                                                                                                                                                                                                                                                                                                                                      | -0,451 |
| 64135     | <i>IFIH1</i>        | interferon induced with helicase C domain 1;CADM-140 autoantigen;DEAD/H (Asp-Glu-Ala-Asp/His) box polypeptide;RIG-I-like receptor 2;RNA helicase-DEAD box protein 116;clinically amyopathic dermatomyositis autoantigen 140 kDa;helicard;helicase with 2 CARD domains;melanoma differentiation associated protein-5;melanoma differentiation-associated protein 5;murabutide down-regulated protein                                                                                                                                     | -0,160 |
| 3433      | <i>IFIT2</i>        | interferon-induced protein with tetratricopeptide repeats 2;Interferon, alpha-inducible protein (MW 54kD);interferon-induced 54 kDa protein;interferon-induced protein 54                                                                                                                                                                                                                                                                                                                                                               | -0,267 |
| 3437      | <i>IFIT3</i>        | interferon-induced protein with tetratricopeptide repeats 3;CIG49;IFI-60K;IFIT-3;IFIT-4;ISG-60;interferon-induced 60 kDa protein;interferon-induced protein with tetratricopeptide repeats 4;retinoic acid-induced gene G protein                                                                                                                                                                                                                                                                                                       | -0,163 |
| 50616     | <i>IL22</i>         | interleukin 22;IL-10-related T-cell-derived inducible factor;IL-10-related T-cell-derived-inducible factor;cytokine Zcyto18                                                                                                                                                                                                                                                                                                                                                                                                             | 0,215  |
| 3575      | <i>IL7R</i>         | interleukin 7 receptor;CD127 antigen;IL-7 receptor subunit alpha;IL-7R subunit alpha;IL-7RA;interleukin 7 receptor alpha chain;interleukin 7 receptor isoform H5-6                                                                                                                                                                                                                                                                                                                                                                      | -0,150 |
| 3581      | <i>IL9R</i>         | interleukin 9 receptor;IL-9 receptor                                                                                                                                                                                                                                                                                                                                                                                                                                                                                                    | 0,216  |
| 3631      | <i>INPP4A</i>       | inositol polyphosphate-4-phosphatase, type I, 107kDa;inositol polyphosphate-4-phosphatase, type I, 107kD;type I inositol-3,4-bisphosphate 4-phosphatase                                                                                                                                                                                                                                                                                                                                                                                 | 0,197  |
| 3394      | <i>IRF8</i>         | interferon regulatory factor 8;interferon consensus sequence binding protein 1                                                                                                                                                                                                                                                                                                                                                                                                                                                          | -0,220 |
| 81168     | <i>ITM2C</i>        | integral membrane protein 2C;BRICHOS domain containing 2C;cerebral protein 14;integral membrane protein 3;transmembrane protein BRI3                                                                                                                                                                                                                                                                                                                                                                                                    | 0,307  |
| 8850      | <i>KAT2B</i>        | K(lysine) acetyltransferase 2B;CREBBP-associated factor;histone acetylase PCAF;histone acetyltransferase PCAF;lysine acetyltransferase 2B;p300/CBP-associated factor                                                                                                                                                                                                                                                                                                                                                                    | 0,196  |
| 56479     | <i>KCNQ5</i>        | potassium channel, voltage gated KQT-like subfamily Q, member 5;KQT-like 5;potassium channel protein;potassium channel subunit alpha KvLQT5;potassium voltage-gated channel, KQT-like subfamily, member 5;voltage-gated potassium channel subunit Kv7.5                                                                                                                                                                                                                                                                                 | -0,232 |
| 3815      | <i>KIT</i>          | v-kit Hardy-Zuckerman 4 feline sarcoma viral oncogene homolog;p145 c-kit;piebald trait protein;proto-oncogene c-Kit;proto-oncogene tyrosine-protein kinase Kit;soluble KIT variant 1;tyrosine-protein kinase Kit;v-kit Hardy-Zuckerman 4 feline sarcoma viral oncogene-like protein                                                                                                                                                                                                                                                     | 0,401  |
| 144811    | <i>LACC1</i>        | laccase (multicopper oxidoreductase) domain containing 1                                                                                                                                                                                                                                                                                                                                                                                                                                                                                | 0,179  |
| 3903      | <i>LAIR1</i>        | leukocyte-associated immunoglobulin-like receptor 1;leukocyte-associated Ig-like receptor 1                                                                                                                                                                                                                                                                                                                                                                                                                                             | 0,177  |
| 54900     | <i>LAX1</i>         | lymphocyte transmembrane adaptor 1;LAT-like membrane associated protein;linker for activation of x cells;membrane-associated adapter protein LAX                                                                                                                                                                                                                                                                                                                                                                                        | 0,138  |
| 4000      | <i>LMNA</i>         | lamin A/C;70 kDa lamin;lamin A/C-like 1;prelamin-A/C;renal carcinoma antigen NY-REN-32                                                                                                                                                                                                                                                                                                                                                                                                                                                  | 0,259  |
| 102724748 | <i>LOC102724748</i> | uncharacterized LOC102724748                                                                                                                                                                                                                                                                                                                                                                                                                                                                                                            | -0,147 |
| 10161     | <i>LPAR6</i>        | lysophosphatidic acid receptor 6;G-protein coupled purinergic receptor P2Y5;LPA receptor 6;LPA-6;P2Y purinoceptor 5;RB intron encoded G-protein coupled receptor;oleoyl-L-alpha-lysophosphatidic acid receptor;purinergic receptor 5;purinergic receptor P2Y G protein-coupled protein 5;purinergic receptor P2Y, G-protein coupled, 5                                                                                                                                                                                                  | 0,251  |
| 54947     | <i>LPCAT2</i>       | lysophosphatidylcholine acyltransferase 2;1-AGP acyltransferase 11;1-AGPAT 11;1-acylglycerol-3-phosphate O-acyltransferase 11;1-acylglycerophosphocholine O-acyltransferase;1-alkylglycerophosphocholine O-acetyltransferase;LPAAT-alpha;LPC acyltransferase 2;LPCAT-2;acetyl-CoA:lyso-PAF acyltransferase;acetyl-CoA:lyso-platelet-activating factor acetyltransferase;acyl-CoA:lysophosphatidylcholine acyltransferase 2;acyltransferase like 1;acyltransferase-like 1;lyso-PAF acyltransferase;lyso-platelet-activating factor (PAF) | 0,204  |
| 9404      | <i>LPXN</i>         | leupaxin                                                                                                                                                                                                                                                                                                                                                                                                                                                                                                                                | 0,231  |
| 4041      | <i>LRP5</i>         | low density lipoprotein receptor-related protein 5;low density lipoprotein receptor-related protein 7                                                                                                                                                                                                                                                                                                                                                                                                                                   | 0,140  |

|        |                |                                                                                                                                                                                                                                                                                                                                                                                                                                                               |        |
|--------|----------------|---------------------------------------------------------------------------------------------------------------------------------------------------------------------------------------------------------------------------------------------------------------------------------------------------------------------------------------------------------------------------------------------------------------------------------------------------------------|--------|
| 2615   | <i>LRRC32</i>  | leucine rich repeat containing 32;garpin;glycoprotein A repetitions predominant                                                                                                                                                                                                                                                                                                                                                                               | -0,159 |
| 54674  | <i>LRN3</i>    | leucine rich repeat neuronal 3;fibronectin type III, immunoglobulin and leucine rich repeat domains 5;leucine-rich repeat protein, neuronal 3;neuronal leucine-rich repeat protein 3                                                                                                                                                                                                                                                                          | 0,142  |
| 1130   | <i>LYST</i>    | lysosomal trafficking regulator;Chediak-Higashi syndrome 1;beige homolog                                                                                                                                                                                                                                                                                                                                                                                      | -0,282 |
| 84441  | <i>MAML2</i>   | mastermind-like 2 (Drosophila);mam-2                                                                                                                                                                                                                                                                                                                                                                                                                          | -0,159 |
| 79648  | <i>MCPH1</i>   | microcephalin 1;BRCT-repeat inhibitor of TERT expression 1                                                                                                                                                                                                                                                                                                                                                                                                    | -0,319 |
| 126308 | <i>MOB3A</i>   | MOB kinase activator 3A;MOB LAK;MOB-LAK;MOB1, Mps One Binder kinase activator-like 2A;mob1 homolog 2A;mps one binder kinase activator-like 2A                                                                                                                                                                                                                                                                                                                 | 0,165  |
| 4599   | <i>MX1</i>     | MX dynamin-like GTPase 1;interferon-induced protein p78;interferon-inducible protein p78;interferon-regulated resistance GTP-binding protein MxA;myxoma resistance protein 1;myxovirus (influenza virus) resistance 1, interferon-inducible protein p78                                                                                                                                                                                                       | -0,282 |
| 4628   | <i>MYH10</i>   | myosin, heavy chain 10, non-muscle;cellular myosin heavy chain, type B;myosin heavy chain, nonmuscle type B;myosin, heavy polypeptide 10, non-muscle;nonmuscle myosin II heavy chain-B;nonmuscle myosin heavy chain 10;nonmuscle myosin heavy chain IIB                                                                                                                                                                                                       | 0,144  |
| 10398  | <i>MYL9</i>    | myosin, light chain 9, regulatory;20 kDa myosin light chain;myosin RLC;myosin regulatory light chain 1;myosin regulatory light chain 2, smooth muscle isoform;myosin regulatory light chain 9;myosin regulatory light chain MRLC1;myosin, light polypeptide 9, regulatory                                                                                                                                                                                     | 0,282  |
| 64005  | <i>MYO1G</i>   | myosin IG;minor histocompatibility antigen HA-2;myosin-Ig                                                                                                                                                                                                                                                                                                                                                                                                     | 0,190  |
| 26509  | <i>MYOF</i>    | myoferlin;fer-1-like 3, myoferlin;fer-1-like family member 3;fer-1-like protein 3                                                                                                                                                                                                                                                                                                                                                                             | 0,296  |
| 85409  | <i>NKD2</i>    | naked cuticle homolog 2 (Drosophila);Dvl-binding protein NKD2                                                                                                                                                                                                                                                                                                                                                                                                 | 0,244  |
| 9111   | <i>NMI</i>     | N-myc (and STAT) interactor;N-myc interactor                                                                                                                                                                                                                                                                                                                                                                                                                  | -0,163 |
| 1728   | <i>NQO1</i>    | NAD(P)H dehydrogenase, quinone 1;DT-diaphorase;NAD(P)H:Quinone acceptor oxidoreductase type 1;NAD(P)H:menadiene oxidoreductase 1;NAD(P)H:quinone oxidoreductase 1;NAD(P)H:quinone oxidoreductase;azoreductase;diaphorase (NADH/NADPH) (cytochrome b-5 reductase);diaphorase-4;dioxin-inducible 1;menadiene reductase;phyloquinone reductase;quinone reductase 1                                                                                               | 0,181  |
| 26012  | <i>NSMF</i>    | NMDA receptor synaptonuclear signaling and neuronal migration factor;nasal embryonic LHRH factor;nasal embryonic luteinizing hormone-releasing hormone factor                                                                                                                                                                                                                                                                                                 | 0,192  |
| 4938   | <i>OAS1</i>    | 2'-5'-oligoadenylate synthetase 1, 40/46kDa;(2'-5')oligo(A) synthase 1;(2'-5')oligo(A) synthetase 1;2',5'-oligo A synthetase 1;2',5'-oligoadenylate synthetase 1, 40/46kDa;2'-5' oligoadenylate synthetase 1 p41 isoform;2'-5' oligoadenylate synthetase 1 p48 isoform;2'-5' oligoadenylate synthetase 1 p49 isoform;2'-5' oligoadenylate synthetase 1 p52 isoform;2'-5'-oligoisoadenylate synthetase 1;2-5A synthase 1;2-5A synthetase 1;E18/E16;p46/p42 OAS | -0,181 |
| 8638   | <i>OASL</i>    | 2'-5'-oligoadenylate synthetase-like;2'-5'-OAS-RP;2'-5'-OAS-related protein;59 kDa 2'-5'-oligoadenylate synthase-like protein;59 kDa 2'-5'-oligoadenylate synthetase-like protein;TR-interacting protein 14;thyroid receptor-interacting protein 14                                                                                                                                                                                                           | -0,269 |
| 167826 | <i>OLIG3</i>   | oligodendrocyte transcription factor 3;class B basic helix-loop-helix protein 7;class E basic helix-loop-helix protein 20;oligo3                                                                                                                                                                                                                                                                                                                              | 0,484  |
| 5008   | <i>OSM</i>     | oncostatin M                                                                                                                                                                                                                                                                                                                                                                                                                                                  | -0,202 |
| 5025   | <i>P2RX4</i>   | purinergic receptor P2X, ligand gated ion channel, 4;ATP receptor;ATP-gated cation channel protein;P2X receptor, subunit 4;purinergic receptor P2X, ligand-gated ion channel, 4;purinergic receptor P2X4;purinoceptor P2X4                                                                                                                                                                                                                                    | 0,248  |
| 64761  | <i>PARP12</i>  | poly (ADP-ribose) polymerase family, member 12;ADP-ribosyltransferase diphtheria toxin-like 12;zinc finger CCCH type domain containing 1                                                                                                                                                                                                                                                                                                                      | -0,185 |
| 83666  | <i>PARP9</i>   | poly (ADP-ribose) polymerase family, member 9;ADP-ribosyltransferase diphtheria toxin-like 9;PARP-9;b aggressive lymphoma protein;poly (ADP-ribose) polymerase 9                                                                                                                                                                                                                                                                                              | -0,161 |
| 10769  | <i>PLK2</i>    | polo-like kinase 2;PLK-2;serine/threonine-protein kinase SNK;serum-inducible kinase                                                                                                                                                                                                                                                                                                                                                                           | 0,142  |
| 5450   | <i>POU2AF1</i> | POU class 2 associating factor 1;B-cell-specific coactivator OBF-1;BOB-1;OCA-B;OCT-binding factor 1;POU domain, class 2, associating factor 1                                                                                                                                                                                                                                                                                                                 | -0,178 |

|        |                 |                                                                                                                                                                                                                                                                                                                                                                                                                                                                                                                                                   |        |
|--------|-----------------|---------------------------------------------------------------------------------------------------------------------------------------------------------------------------------------------------------------------------------------------------------------------------------------------------------------------------------------------------------------------------------------------------------------------------------------------------------------------------------------------------------------------------------------------------|--------|
| 5468   | <i>PPARG</i>    | peroxisome proliferator-activated receptor gamma;PPAR-gamma;nuclear receptor subfamily 1 group C member 3;peroxisome proliferator-activated nuclear receptor gamma variant 1                                                                                                                                                                                                                                                                                                                                                                      | -0,167 |
| 81706  | <i>PPP1R14C</i> | protein phosphatase 1, regulatory (inhibitor) subunit 14C;PKC-potiated PP1 inhibitory protein;kinase C-enhanced PP1 inhibitor;kinase-enhanced PP1 inhibitor;serologically defined breast cancer antigen NY-BR-81                                                                                                                                                                                                                                                                                                                                  | 0,224  |
| 10216  | <i>PRG4</i>     | proteoglycan 4;articular superficial zone protein;hemangiopoietin;lubricin;megakaryocyte stimulating factor;superficial zone proteoglycan                                                                                                                                                                                                                                                                                                                                                                                                         | -0,266 |
| 138639 | <i>PTPDC1</i>   | protein tyrosine phosphatase domain containing 1;protein tyrosine phosphatase PTP9Q22                                                                                                                                                                                                                                                                                                                                                                                                                                                             | 0,164  |
| 5774   | <i>PTPN3</i>    | protein tyrosine phosphatase, non-receptor type 3;cytoskeletal-associated protein tyrosine phosphatase;protein-tyrosine phosphatase H1                                                                                                                                                                                                                                                                                                                                                                                                            | 0,349  |
| 23682  | <i>RAB38</i>    | RAB38, member RAS oncogene family;Rab-related GTP-binding protein;melanoma antigen NY-MEL-1                                                                                                                                                                                                                                                                                                                                                                                                                                                       | 0,328  |
| 5920   | <i>RARRES3</i>  | retinoic acid receptor responder (tazarotene induced) 3;HRAS-like suppressor 4;RAR-responsive protein TIG3;retinoic acid-inducible gene 1;retinoid-inducible gene 1 protein;tazarotene-induced gene 3 protein                                                                                                                                                                                                                                                                                                                                     | -0,179 |
| 115727 | <i>RASGRP4</i>  | RAS guanyl releasing protein 4;guanyl nucleotide releasing protein 4                                                                                                                                                                                                                                                                                                                                                                                                                                                                              | 0,174  |
| 8787   | <i>RGS9</i>     | regulator of G-protein signaling 9;regulator of G-protein signalling 9                                                                                                                                                                                                                                                                                                                                                                                                                                                                            | -0,166 |
| 9781   | <i>RNF144A</i>  | ring finger protein 144A;UbcM4-interacting protein 4;probable E3 ubiquitin-protein ligase RNF144A;ring finger protein 144;ubiquitin conjugating enzyme 7 interacting protein 4;ubiquitin-conjugating enzyme 7-interacting protein 4                                                                                                                                                                                                                                                                                                               | 0,149  |
| 50484  | <i>RRM2B</i>    | ribonucleotide reductase M2 B (TP53 inducible);TP53-inducible ribonucleotide reductase M2 B;p53-inducible ribonucleotide reductase small subunit 2 homolog;p53-inducible ribonucleotide reductase small subunit 2 short form beta;p53-inducible ribonucleotide reductase small subunit 2-like protein                                                                                                                                                                                                                                             | 0,247  |
| 1901   | <i>S1PR1</i>    | sphingosine-1-phosphate receptor 1;S1P receptor 1;S1P receptor Edg-1;endothelial differentiation G-protein coupled receptor 1;endothelial differentiation, sphingolipid G-protein-coupled receptor, 1;sphingosine 1-phosphate receptor EDG1;sphingosine 1-phosphate receptor Edg-1                                                                                                                                                                                                                                                                | 0,141  |
| 154075 | <i>SAMD3</i>    | sterile alpha motif domain containing 3;SAM domain-containing protein 3                                                                                                                                                                                                                                                                                                                                                                                                                                                                           | -0,187 |
| 64092  | <i>SAMSN1</i>   | SAM domain, SH3 domain and nuclear localization signals 1;SAM and SH3 domain containing 2;SAM domain, SH3 domain and nuclear localisation signals, 1;SAM domain, SH3 domain and nuclear localization signals protein 1;SH3-SAM adaptor protein;Src homology domain 3 (SH3)-containing adapter protein SH3 lymphocyte protein 2;hematopoietic adapter-containing SH3 and sterile $\alpha$ -motif (SAM) domains 1;hematopoietic adapter-containing SH3 and sterile alpha-motif (SAM) domains 1;hematopoietic adaptor containing SH3 and SAM domains | 0,177  |
| 6303   | <i>SAT1</i>     | spermidine/spermine N1-acetyltransferase 1;diamine N-acetyltransferase 1;polyamine N-acetyltransferase 1;putrescine acetyltransferase;spermidine/spermine N1-acetyltransferase alpha                                                                                                                                                                                                                                                                                                                                                              | -0,144 |
| 6304   | <i>SATB1</i>    | SATB homeobox 1;special AT-rich sequence binding protein 1 (binds to nuclear matrix/scaffold-associating DNA);special AT-rich sequence-binding protein 1                                                                                                                                                                                                                                                                                                                                                                                          | -0,194 |
| 6402   | <i>SELL</i>     | selectin L;CD62 antigen-like family member L;gp90-MEL;leukocyte surface antigen Leu-8;leukocyte-endothelial cell adhesion molecule 1;lymph node homing receptor;lymphocyte adhesion molecule 1;pln homing receptor                                                                                                                                                                                                                                                                                                                                | -0,233 |
| 27244  | <i>SESN1</i>    | sestrin 1;p53 activated gene 26;p53 regulated PA26 nuclear protein                                                                                                                                                                                                                                                                                                                                                                                                                                                                                | 0,151  |
| 57823  | <i>SLAMF7</i>   | SLAM family member 7;19A24 protein;CD2 subset 1;CD2-like receptor activating cytotoxic cells;CD2-like receptor-activating cytotoxic cells;membrane protein FOAP-12;novel LY9 (lymphocyte antigen 9) like protein;protein 19A                                                                                                                                                                                                                                                                                                                      | 0,160  |
| 6509   | <i>SLC1A4</i>   | solute carrier family 1 (glutamate/neutral amino acid transporter), member 4;ASCT-1;alanine/serine/cysteine/threonine transporter 1;glutamate/neutral amino acid transporter;solute carrier family 1 member 4                                                                                                                                                                                                                                                                                                                                     | 0,146  |
| 51312  | <i>SLC25A37</i> | solute carrier family 25 (mitochondrial iron transporter), member 37;mitochondrial iron transporter 1;mitochondrial solute carrier protein;mitoferrin;predicted protein of HQ2217;solute carrier family 25, member 37                                                                                                                                                                                                                                                                                                                             | -0,159 |
| 5172   | <i>SLC26A4</i>  | solute carrier family 26 (anion exchanger), member 4;sodium-independent chloride/iodide transporter                                                                                                                                                                                                                                                                                                                                                                                                                                               | -0,173 |
| 6513   | <i>SLC2A1</i>   | solute carrier family 2 (facilitated glucose transporter), member 1;choreoathetosis/spasticity, episodic (paroxysmal choreoathetosis/spasticity);glucose transporter type 1, erythrocyte/brain;hepG2 glucose transporter;human T-cell leukemia virus (I and II) receptor;receptor for HTLV-1 and HTLV-2                                                                                                                                                                                                                                           | 0,164  |
| 401548 | <i>SNX30</i>    | sorting nexin family member 30                                                                                                                                                                                                                                                                                                                                                                                                                                                                                                                    | 0,149  |

|        |                 |                                                                                                                                                                                                                                                                                                               |        |
|--------|-----------------|---------------------------------------------------------------------------------------------------------------------------------------------------------------------------------------------------------------------------------------------------------------------------------------------------------------|--------|
| 6654   | <i>SOS1</i>     | son of sevenless homolog 1 (Drosophila);SOS-1;gingival fibromatosis, hereditary, 1;guanine nucleotide exchange factor                                                                                                                                                                                         | -0,143 |
| 401236 | <i>STMND1</i>   | stathmin domain containing 1                                                                                                                                                                                                                                                                                  | 0,236  |
| 387082 | <i>SUMO4</i>    | small ubiquitin-like modifier 4;SMT3 suppressor of mif two 3 homolog 2;SMT3 suppressor of mif two 3 homolog 4;insulin-dependent diabetes mellitus 5;small ubiquitin-like modifier 4 protein                                                                                                                   | 0,302  |
| 7041   | <i>TGFB111</i>  | transforming growth factor beta 1 induced transcript 1;androgen receptor coactivator 55 kDa protein;androgen receptor coactivator ARA55;androgen receptor-associated protein of 55 kDa;hydrogen peroxide-inducible clone 5 protein;hydrogen peroxide-inducible clone-5                                        | 0,145  |
| 7070   | <i>THY1</i>     | Thy-1 cell surface antigen;CDw90;Thy-1 T-cell antigen;thy-1 antigen                                                                                                                                                                                                                                           | -0,142 |
| 201633 | <i>TIGIT</i>    | T cell immunoreceptor with Ig and ITIM domains;V-set and immunoglobulin domain containing 9;V-set and immunoglobulin domain-containing protein 9;V-set and transmembrane domain containing 3;V-set and transmembrane domain-containing protein 3;Washington University cell adhesion molecule                 | -0,265 |
| 25976  | <i>TIPARP</i>   | TCDD-inducible poly(ADP-ribose) polymerase;ADP-ribosyltransferase diphtheria toxin-like 14;poly [ADP-ribose] polymerase 7                                                                                                                                                                                     | 0,204  |
| 51768  | <i>TM7SF3</i>   | transmembrane 7 superfamily member 3;seven span transmembrane protein;seven transmembrane protein TM7SF3                                                                                                                                                                                                      | 0,528  |
| 153339 | <i>TMEM167A</i> | transmembrane protein 167A;transmembrane protein 167                                                                                                                                                                                                                                                          | 0,144  |
| 23670  | <i>TMEM2</i>    | transmembrane protein 2                                                                                                                                                                                                                                                                                       | 0,491  |
| 9540   | <i>TP53I3</i>   | tumor protein p53 inducible protein 3;p53-induced gene 3 protein;quinone oxidoreductase homolog                                                                                                                                                                                                               | 0,186  |
| 9618   | <i>TRAF4</i>    | TNF receptor-associated factor 4;MLN 62;RING finger protein 83;TRAF4 variant 6;cysteine-rich domain associated with RING and Traf domains protein 1;cysteine-rich domain associated with ring and TRAF domain;malignant 62;metastatic lymph node gene 62 protein;tumor necrosis receptor-associated factor 4A | 0,140  |
| 1831   | <i>TSC22D3</i>  | TSC22 domain family, member 3;DSIP-immunoreactive leucine zipper protein;DSIP-immunoreactive peptide;TSC-22 related protein;TSC-22-like protein;TSC-22-related protein;delta sleep inducing peptide, immunoreactor;delta sleep-inducing peptide immunoreactor;glucocorticoid-induced leucine zipper protein   | 0,146  |
| 90139  | <i>TSPAN18</i>  | tetraspanin 18;tspan-18                                                                                                                                                                                                                                                                                       | -0,173 |
| 10628  | <i>TXNIP</i>    | thioredoxin interacting protein;thioredoxin binding protein 2;thioredoxin-binding protein 2;upregulated by 1,25-dihydroxyvitamin D-3;vitamin D3 up-regulated protein 1                                                                                                                                        | 0,149  |
| 401447 | <i>USP17L1</i>  | ubiquitin specific peptidase 17-like family member 1;deubiquitinating enzyme 17-like protein 1;putative ubiquitin carboxyl-terminal hydrolase 17-like protein 1;ubiquitin thioesterase 17-like protein 1;ubiquitin-specific-processing protease 17-like protein 1                                             | 0,141  |
| 64393  | <i>ZMAT3</i>    | zinc finger, matrin-type 3;WIG-1/PAG608 protein;p53 target zinc finger protein;p53-activated gene 608 protein;zinc finger protein WIG-1;zinc finger protein WIG1;zinc finger, matrin type 3                                                                                                                   | 0,199  |

---
